# Supplementary material for: Effect of Teriflunomide and Dimethyl Fumarate on Cortical Atrophy and Leptomeningeal Inflammation in Multiple Sclerosis: A Retrospective, Observational, Case-Control Pilot Study
Source: PubMed Central journal article supplement (PMC6463015; doi:10.3390/jcm8030344), 2019-03-12
Supplement: jcm-08-00344-s001.pdf [file jcm-08-00344-s001.pdf]

**Table S1.** MRI brain volume characteristics of MS patients treated with teriflunomide or dimethyl fumarate over the follow-up, who were examined only on the 3T scanner.

|        | 0–12 Months     |                 |                 | 12–24 Months    |                 |                 | 0–24 Months     |                 |                 |
|--------|-----------------|-----------------|-----------------|-----------------|-----------------|-----------------|-----------------|-----------------|-----------------|
|        | TFM<br>(n = 39) | DMF<br>(n = 45) | <i>p</i> -Value | TFM<br>(n = 31) | DMF<br>(n = 37) | <i>p</i> -Value | TFM<br>(n = 31) | DMF<br>(n = 37) | <i>p</i> -Value |
| PBVC   | -0.98 (1.4)     | -1.1 (1.5)      | 0.876           | -1.04 (1.1)     | -1.30 (1.7)     | 0.530           | -1.50 (1.6)     | -2.1 (1.6)      | 0.188           |
| PGMVC  | -0.34 (4.1)     | -1.81 (2.9)     | <i>0.086</i>    | -0.54 (4.1)     | -1.69 (4.1)     | 0.374           | -0.57 (4.7)     | -3.4 (4.4)      | <b>0.001</b>    |
| PWMVC  | -2.07 (4.3)     | -1.60 (4.1)     | 0.288           | -2.69 (5)       | -1.9 (3.5)      | 0.324           | -4.53 (4.5)     | -3.90 (4.7)     | 0.347           |
| PLVVC  | 0.2 (5.1)       | 2.2 (5)         | 0.324           | 1.8 (3.7)       | 1.7 (3.9)       | 0.970           | 2.6 (4.5)       | 4.2 (6.2)       | 0.165           |
| PCVC   | -0.87 (3.8)     | -1.86 (2.7)     | 0.183           | -0.49 (4)       | -1.65 (3.2)     | 0.254           | -0.35 (4)       | -3.34 (3.9)     | <b>0.01</b>     |
| PTVC   | -1.14 (2.3)     | -3.1 (2.7)      | 0.225           | -0.61 (3.2)     | -2.26 (4.5)     | <i>0.058</i>    | -1.43 (3.5)     | -3.69 (5.8)     | <b>0.046</b>    |
| PDGMVC | -0.6 (3.9)      | -1.8 (3.4)      | 0.385           | -0.68 (4.5)     | -1.5 (3.4)      | <b>0.037</b>    | -1.34 (4.3)     | -4.1 (5.6)      | <b>0.008</b>    |

TFM-teriflunomide; DMF-dimethyl fumarate; PBVC-percentage brain volume change; PGMVC-percentage gray matter volume change; PWMVC-percentage white matter volume change; PLVVC-percentage lateral ventricle volume change, PCVC-percentage cortical volume change; PTVC-percentage thalamus volume change; PDGMVC-percentage deep GM volume change. *p*-values derived from ANCOVA, corrected for age and sex. *p*-values shown in bold and italics are  $\leq 0.05$  and  $\leq 0.1$ , respectively.
